1 **Title (13 words; 50 words max)**

2 Frequency shifts and depth dependence of premotor beta  
3 band activity during perceptual decision-making

4

5 **Abbreviated Title (50 char; 50 char max)**

6 Premotor beta band activity during decision-making

7

8 Chandramouli Chandrasekaran<sup>1,3\*</sup>, Iliana E. Bray<sup>1,\*</sup>, Krishna V. Shenoy<sup>1-6</sup>

9

10 <sup>1</sup>Department of Electrical Engineering, Stanford University, CA, USA 94305

11 <sup>2</sup>Department of Neurobiology, Stanford University, CA, USA 94305

12 <sup>3</sup>Howard Hughes Medical Institute, Stanford University, CA, USA 94305

13 <sup>4</sup>Department of Bioengineering, Stanford University, CA, USA 94305

14 <sup>5</sup>Stanford Neurosciences Institute, Stanford University, CA, USA 94305

15 <sup>6</sup>Bio-X program, Stanford University, CA, USA 94305

16 \* both authors contributed equally to this work

17

18

19

20 **AUTHOR CONTRIBUTIONS**

21 CC and KVS designed the experiments. CC performed the experiments, trained animals, and  
22 performed neurophysiological recordings. IEB and CC performed analyses together. IEB, CC,  
23 and KVS all wrote the paper. KVS was involved in all aspects of the manuscript.

24

25 **CONFLICT OF INTEREST**

26 KVS is a consultant for Neuralink Corp. and is on the scientific advisory board for CTRL-Labs  
27 Inc., MIND-X Inc., Inscopix Inc. and Heal Inc.

28

29 **ACKNOWLEDGEMENTS**

30 IEB was supported by the National Science Foundation Graduate Research Fellowship under  
31 Grant No. DGE-1656518. CC was supported by a NIH/NINDS K99/R00 award K99NS092972  
32 and supported by HHMI as a research specialist. KVS was supported by the following awards:  
33 NIH Director's Pioneer Award 8DP1HD075623, Defense Advanced Research Projects Agency  
34 (DARPA) Biological Technology Office (BTO) "NeuroFAST" award W911NF-14-2-0013, the  
35 Simons Foundation Collaboration on the Global Brain awards 325380 and 543045, and the  
36 Howard Hughes Medical Institute.

37

38 **WORD COUNTS**

39 Abstract - (243 words; 250 words max)

40 Significance Statement - (118 words; 120 words max)

41 Introduction - (647 words; 650 max)

42 Discussion - (1476 words; 1500 words max)

43 **ABSTRACT (243 words; 250 words max)**

44

45 Neural activity in the premotor and motor cortex shows prominent structure in the beta  
46 frequency range (13-30 Hz). Currently, the behavioral relevance of beta band activity (BBA) in  
47 premotor and motor regions is not well understood. The underlying source of motor BBA and  
48 how it changes as a function of cortical depth is also unknown. Here, we addressed these  
49 unresolved questions by investigating BBA recorded using laminar electrodes in the dorsal  
50 premotor cortex (PMd) of two male rhesus macaques performing a visual reaction time (RT)  
51 reach discrimination task. We observed robust BBA before and after the onset of the visual  
52 stimulus but not during the arm movement. While post-stimulus BBA was positively correlated  
53 with RT throughout the beta frequency range, pre-stimulus correlation varied by frequency. Low  
54 beta frequencies (~15 to 20 Hz) were positively correlated with RT and high beta frequencies  
55 (~25 to 30 Hz) were negatively correlated with RT. Simulations suggested that these frequency-  
56 dependent correlations could be due to a shift in the component frequencies of the pre-stimulus  
57 BBA as a function of RT, such that faster RTs are accompanied by greater power in high beta  
58 frequencies. We also observed a laminar dependence of BBA, with deeper electrodes  
59 demonstrating stronger power in low beta frequencies both pre- and post-stimulus. The  
60 heterogeneous nature of BBA and the changing relationship between BBA and RT in different  
61 task epochs may be a sign of the differential network dynamics involved in expectation,  
62 decision-making, and motor preparation.

63

64 **SIGNIFICANCE STATEMENT (118 words; 120 words max)**

65

66 Beta band activity (BBA) has been implicated in motor tasks, in disease states, and as a signal  
67 for brain-machine interfaces. However, the functional role of BBA and its laminar organization in  
68 motor cortex are poorly understood. Here we addressed these unresolved issues using  
69 simultaneous recordings from multiple cortical layers of the motor cortex of monkeys performing  
70 a decision-making task. Our key finding is that BBA is not a monolithic signal. Instead, BBA  
71 seems to be composed of at least two frequency bands. The relationship between BBA and  
72 eventual behavior, such as reaction time, also dynamically changes depending on task epoch.  
73 We also found that BBA is laminarly organized, with greater power in deeper electrodes for low  
74 beta frequencies.

75

76 **INTRODUCTION (647 words; 650 max)**

77

78 Fluctuations in the beta (13-35 Hz) range of the local field potential (LFP) and spiking activity  
79 are consistently observed in monkeys performing instructed delay (Sanes and Donoghue, 1993;  
80 Zhang et al., 2008; Kilavik et al., 2012, 2013; Stetson and Andersen, 2014; Khanna and  
81 Carmena, 2017) and cognitive tasks (Murthy and Fetz, 1992; Lee, 2003; Buschman and Miller,  
82 2007; Pesaran et al., 2008; DePasquale and Graybiel, 2015; Sherman et al., 2016; Haegens et  
83 al., 2017). Other studies demonstrated prominent BBA in humans performing motor and  
84 cognitive tasks (Rubino et al., 2006; Tzagarakis et al., 2010; Zaepffel et al., 2013). Clinical  
85 studies suggest that BBA changes with age (Rossiter et al., 2014b), is modulated in disease  
86 states (Brown, 2006; Brittain et al., 2014; Rossiter et al., 2014a; Proudfoot et al., 2017), and

87 may be useful for brain machine interfaces (Bai et al., 2008; Flint et al., 2013; So et al., 2014;  
88 Gilja et al., 2015; Stavisky et al., 2015; Pandarinath et al., 2017a). Despite insights gained about  
89 BBA, questions about its role and origin still remain. Here, we focus on two unresolved  
90 questions.

91  
92 First, we wanted to understand the relevance of BBA in the motor system for decision-  
93 making. Three hypotheses have been proposed for the role of BBA in the motor system –  
94 postural holding, maintenance of the current state, and attention – each making specific  
95 predictions relating BBA and RT (Figure 1, Khanna and Carmena, 2015). The postural holding  
96 hypothesis posits that BBA is related to keeping the hand still during the hold period of  
97 instructed delay tasks (Baker et al., 1999; Kristeva et al., 2007). A second hypothesis suggests  
98 that BBA represents the desire to maintain the current state of being (e.g., resisting start of  
99 movement) (Gilbertson et al., 2005; Pogosyan et al., 2009; Engel and Fries, 2010). The  
100 attentional hypothesis emerged from the study of reach-target selection tasks and suggests that  
101 BBA reflects attention (Bouyer et al., 1987; Murthy and Fetz, 1992; Zhang et al., 2008; Saleh et  
102 al., 2010). Here, we addressed the behavioral relevance of BBA by examining the relationship  
103 between RT and BBA recorded from PMd of two monkeys (Zhang et al., 2008; Saleh et al.,  
104 2010; Tzagarakis et al., 2010; Kilavik et al., 2012; Khanna and Carmena, 2017). The monkeys  
105 performed a visual reach decision-making task that engaged their attention, involved the  
106 somatomotor system, and induced significant RT variability beyond the variability induced by the  
107 different stimulus difficulties.

108  
109 Second, we wanted to improve on the currently vague description of the laminar  
110 organization of BBA in premotor and motor cortex. Some studies suggest that neurons in  
111 deeper cortical layers of M1 (especially layer V) are involved in the generation of BBA (Wetmore  
112 and Baker, 2004; Chen and Fetz, 2005; Roopun et al., 2006; Yamawaki et al., 2008). Others  
113 suggest that all cortical layers in M1 are involved in BBA (Kondabolu et al., 2016; Sherman et  
114 al., 2016). Identifying how BBA changes as a function of cortical depth is needed for developing  
115 the next generation of computational models (Kopell et al., 2011; Lee et al., 2013; Bhatt et al.,  
116 2016; Sherman et al., 2016). To study the laminar organization of BBA, we used multi-contact  
117 electrodes that provided simultaneous recordings across different cortical depths.

118  
119 We observed that both pre- and post-stimulus BBA was correlated to RT, thus ruling out  
120 the postural holding hypothesis. Post-stimulus BBA was positively correlated with RT throughout  
121 the 13-35 Hz range, while the correlation between RT and pre-stimulus BBA was positive in the  
122 low beta frequencies (~15 to 20 Hz) and negative in the high beta frequencies (~25 to 35 Hz).  
123 Through simulation, we identified that frequency-dependent correlations between RT and pre-  
124 stimulus LFP power spectra could potentially emerge from a shift in pre-stimulus BBA to higher  
125 frequencies for faster RTs. We also found that power spectra of LFPs recorded in deeper  
126 electrodes demonstrated more power in low beta frequencies both pre- and post-stimulus.

127  
128

129 **METHODS**

130

131 **EXPERIMENTAL DESIGN:**

132

133 Here we provide a brief description of the experimental design. Additional details about training  
134 and surgery in addition to a description of single neuron responses during the various epochs  
135 are found in a previous study (Chandrasekaran et al., 2017). This study focuses on analysis of  
136 the pre-stimulus and post-stimulus LFP recorded during the same experiments.

137

138 **Subjects:** Our experiments were conducted using two adult male macaque monkeys (*Macaca*  
139 *mulatta*; Monkey T, seven years, 14 kg; O, eleven years, 15.5 kg) trained to reach for visual  
140 targets for a juice reward. Monkeys were housed in a social vivarium with a normal day/night  
141 cycle. The protocols for our experiments were approved by the Stanford University Institutional  
142 Animal Care and Use Committee. We initially trained monkeys to come out of the cage and sit  
143 comfortably in a chair. After initial training, we performed sterile surgeries during which monkeys  
144 were implanted with head restraint holders (Crist Instruments, cylindrical head holder) and  
145 standard recording cylinders (Crist Instruments). Cylinders were centered over caudal PMd (+  
146 16, 15 stereotaxic coordinates) and placed surface normal to the cortex. We covered the skull  
147 within the cylinder with a thin layer of dental acrylic/palacos.

148

149 **Apparatus:** The general set-up for the experiments is shown in [Fig. 2a](#). Monkeys sat in a  
150 customized chair (Crist Instruments, Snyder Chair) with the head restrained via the surgical  
151 implant. The arm not used for reaching was gently restrained using a tube and a cloth sling.  
152 Experiments were controlled and data collected under a custom computer control system (xPC  
153 target and Psychophysics Toolbox). Stimuli were displayed on an Acer HN2741 computer  
154 screen placed approximately 30 cm from the monkey. A photodetector (Thorlabs PD360A) was  
155 used to record the onset of the visual stimulus at a 1 ms resolution. Each session we taped a  
156 small reflective hemispherical bead (11.5 mm, NDI Digital passive spheres) to the middle digit of  
157 the right hand (left hand for Monkey O). The bead was taped 1 cm from the tips of the fingers,  
158 and the position of this bead was tracked optically in the infrared (60 Hz, 0.35 mm root mean  
159 square accuracy; Polaris system; Northern Digital). Eye position was tracked with an overhead  
160 infrared camera (estimated accuracy of 1°, Iscan, Burlington, MA). To get a stable eye image for  
161 the overhead infrared camera which acquires the eye image, an infrared mirror transparent to  
162 visible light was positioned at a 45° angle (facing upwards) immediately in front of the nose. This  
163 mirror reflected the image of the eye in the infrared range while letting visible light pass through.  
164 A visor placed around the chair prevented the monkey from bringing the bead to his mouth or  
165 touching the infrared mirror or the juice tube.

166

167 **Task structure:** Experiments consisted of a sequence of trials, which each lasted a few  
168 seconds; successful trials resulted in a juice reward, and unsuccessful trials resulted in a time-  
169 out lasting 2-4 seconds. An example trial timeline is shown in [Fig. 2b](#). Monkeys used their  
170 unrestrained arm (Monkey T used his right arm, Monkey O used his left arm) to reach to touch  
171 either red or green targets based on the dominant color in a central, static checkerboard cue  
172 composed of isoluminant red and green squares. For every trial, the monkey placed his

173 unrestrained arm on a central target (diameter = 24 mm) and fixated on a small white cross  
174 (diameter = 6 mm). After ~350-400 ms had elapsed, two isoluminant colored targets appeared  
175 100 mm to the right and left of the central target. The target configuration was randomized so  
176 that colors were not always tied to reach directions: sometimes the red target was on the left  
177 and green on the right, while other trials had the opposite configuration. After an additional hold  
178 period (varying from 400 to 900 ms), a static checkerboard cue (15 x 15 grid of squares; each  
179 square 2.5 mm x 2.5 mm) composed of isoluminant red and green squares appeared on the  
180 screen around the fixation cross (example stimuli are shown in Fig. 2c). The monkeys reached  
181 for the target whose color matched the dominant color in the central checkerboard cue. For  
182 example, when there was more green than red in the central checkerboard cue, the monkey  
183 had to choose the green target. To “choose” a target, the animals moved their hand from the  
184 central hold point and stably held a target for a short duration (minimum of 200 ms). The task  
185 was an RT paradigm, so the monkeys were free to initiate their reach whenever they felt there  
186 was sufficient evidence for them to provide a response. We did not impose any delayed  
187 feedback procedure in this task such as a delay between the time of reward and the completion  
188 of a reach for a correct target. The juice reward was provided to the monkey immediately after  
189 the monkey provided a correct response (Roitman and Shadlen, 2002).

190  
191 We parameterized the checkerboard cue at several different levels from almost fully red  
192 to almost fully green. We used 14 levels of red (ranging from 11 red squares to 214 red  
193 squares) in the central checkerboard cue. Each level of red had a complementary green level  
194 (e.g., 214 R, 11 G; and 214 G, 11 R-squares). This defined seven levels of color coherence  
195 (defined as  $C = \frac{100 \times |R-G|}{R+G}$ ), ranging from 4 – 90%. The corresponding signed color coherence  
196 was estimated without taking the absolute value of the difference ( $SC = \frac{100 \times (R-G)}{R+G}$ ). For Monkey  
197 T, we used a uniform distribution of hold period durations between the onset of the targets and  
198 the onset of the checkerboard cue. Monkey O attempted to anticipate the checkerboard cue  
199 onset. To minimize this anticipation and reduce predictability we used an exponential hold  
200 period duration (400 – 800 ms) between the onset of the targets and the onset of the  
201 checkerboard cue.

202  
203 **Electrophysiological Recordings:** Stereotactic coordinates, known response properties of  
204 PMd and M1, and neural responses to muscle palpation served as our guides for  
205 electrophysiological recordings. We placed the chambers surface normal to the cortex to align  
206 with the skull of the monkey, and recordings were performed perpendicular to the surface of the  
207 brain. Recordings were made anterior to the central sulcus, lateral to the spur of the arcuate  
208 sulcus, and lateral to the precentral dimple. For both monkeys, we confirmed our estimate of the  
209 upper and lower arm representation by repeated palpation at a large number of sites to identify  
210 muscle groups associated with the sites. Monkey T used his right arm to perform tasks while O  
211 used his left arm. Recordings were performed in PMd and M1 contralateral to the arm used by  
212 the monkey.

213  
214 We performed linear multi-contact electrode (U-probe) recordings in the same manner  
215 as single electrode recordings with some minor modifications. We used a slightly sharpened

216 guide tube to allow the U-probe to penetrate the Dura more easily. We also periodically scraped  
217 away any overlying tissue on the dura under anesthesia. Sharp guide tubes and scraping away  
218 dura greatly facilitated penetration of the U-probe. We typically penetrated the brain at very slow  
219 rates (~2 - 5  $\mu\text{m/s}$ ). Once we felt that we had a reasonable sample population of neurons  
220 potentially spanning different cortical layers, we stopped and waited for 45-60 min for the  
221 neuronal responses to stabilize. The experiments then progressed as usual. We used 180  $\mu\text{m}$   
222 thick, 16-electrode U-probes with an inter-electrode spacing of 150  $\mu\text{m}$ ; electrode contacts were  
223 ~100 k $\Omega$  in impedance.

224  
225 We attempted to minimize the variability in U-probe placement on a session-by-session  
226 basis so that we could average across sessions. Our approach was to place the U-probe so that  
227 the most superficial electrodes (electrodes 1, 2 on the 16 channel probe) were able to record  
228 multi-unit spiking activity. Any further movement of the electrode upwards resulted in the spiking  
229 activity for those electrodes disappearing and a change in the overall activity pattern of the  
230 electrode (suppression of overall LFP amplitudes). Similarly, driving the electrodes deeper  
231 resulted in multiphasic extracellular waveforms and also a change in auditory markers which  
232 were characterized by decreases in overall signal intensity and frequency content; both markers  
233 suggested that the electrode entered white matter (Cooper et al., 1969). We utilized these  
234 physiological markers as a guide to place electrodes and thereby minimize variability in  
235 electrode placement on a session-by-session basis. Recording yields and this careful electrode  
236 placement were in general better in monkey T (average of ~16 units per session) than monkey  
237 O (average of ~9 units per session). Random placement of U-probes on a day-to-day basis  
238 would flatten out the average visuomotor index and dilute or entirely remove significant  
239 differences in the discrimination time differences between superficial and deep electrodes.

240  
241 The insertion technique necessitated a careful watch over the electrode while lowering to  
242 ensure that it did not bend, break at the tip or excessively dimple the dura. We therefore were  
243 unable to use a grid system to precisely localize the location of the U-probes on different days  
244 and to provide a map of how laminar profiles change in the rostrocaudal direction.

245  
246 **Local field potentials:** LFP recordings in T were performed using a 2 KHz sampled signal. We  
247 then resampled this signal at 1 KHz and performed subsequent spectral analysis on appropriate  
248 time epochs. For monkey O, two methods were used. For 17 of the sessions, we recorded LFP  
249 at 2 KHz, as in T. For the remaining 27 sessions, we recorded broadband extracellular activity  
250 at 30 KHz. We resampled this broadband extracellular signal at 1 KHz and then again used it for  
251 subsequent spectral analysis. All resampling was performed using the MATLAB resample  
252 command that first applies a delay compensating low pass filter and then subsequently  
253 resamples the data avoiding antialiasing.

254  
255 **Reaction Time:** Reaction time (RT) is defined as the time between stimulus onset and the  
256 monkey's selection of a target. RT is described in units of milliseconds. A reaction time less than  
257 or equal to 300 ms indicates that the monkey did not incorporate the presented stimulus into his  
258 response. These trials are not representative of decision-making based on the provided  
259 stimulus and were therefore removed from our analysis.

260

261 **STATISTICAL ANALYSIS:**

262

263 **Psychometric curves for accuracy:** For the analysis of the behavior, we used the same 24  
264 sessions for monkey T (47,483 trials) and 44 sessions for monkey O (70,250 trials) from which  
265 we examined electrophysiological data. Fits to psychometric curves and RT regressions were  
266 performed on a per-session basis and then averaged over sessions. The behavior of an  
267 average session was estimated from ~1500 trials. RT was estimated for each session by  
268 including both correct and incorrect trials for each signed color coherence.

269

270 We fit psychometric curves that describe how discrimination accuracy changed as a  
271 function of color coherence. For every experiment, we estimated the monkey's sensitivity to the  
272 checkerboard cue by estimating the probability ( $p$ ) of a correct choice as a function of the color  
273 coherence of the checkerboard cue ( $C$ ). We used the `psignifit` toolbox to fit this accuracy  
274 function using a Weibull cumulative distribution function (Wichmann and Hill, 2001):

275

$$p(c) = 1 - 0.5e^{-(c/\alpha)^\gamma}$$

276

277 The discrimination threshold,  $\alpha$ , is the color coherence level at which the monkey would make  
278 81.6% correct choices. The second parameter,  $\gamma$ , describes the slope of the psychometric  
279 function. The mean  $\alpha$  parameter across sessions was used as the threshold. We fit threshold and  
280 slope parameters on a session-by-session basis and averaged the estimates. The mean and  
281 standard deviation of the threshold estimates are reported in [Fig. 2d](#).

282

283 **RT vs. coherence:** To examine if RT changed with color coherence, we adopted the procedure  
284 from (Roitman and Shadlen, 2002) and used a linear regression between RT and log  
285 coherence.

286

$$RT(c) = \text{intercept} + a_c \log_e(c)$$

287

288 We fit this regression model ([Fig. 2e](#)) with  $a_c$  as the slope of the regression.

289

290 **Power spectra:** To estimate the power spectra, we used the Chronux toolbox for MATLAB  
291 (Mitra and Bokil, 2008; Mitra et al., 2016) which implements the multi-taper spectral estimation  
292 method, with a time-bandwidth product of three and with five leading tapers. Choice of other  
293 tapers did not result in any changes in our conclusions. We removed the DC offset from the LFP  
294 time series and used a second-order IIR notch filter to remove line noise (Mitra and Bokil, 2008;  
295 Mitra et al., 2016). Line noise, which is centered at 60 Hz, arises from radiative electrical pickup  
296 from lights and power sockets, currents due to ground loops, and currents induced by magnets  
297 in DC power supplies in the experimental setup (Mitra and Bokil, 2008). We centered the filter at  
298 60 Hz and set the quality factor (related to the filter bandwidth) to 35. The power spectra have  
299 arbitrary units (A.U.) before they are normalized.

300

301 We only plot the power spectra from 2 Hz to 50 Hz. We saw no significant activity in the

302 range of 50 Hz to 500 Hz. For the normalized power spectra from 2 to 90 Hz, the Z scores from  
303 50 Hz through 90 Hz were below zero for all analyzed periods of the task (pre-stimulus, post-  
304 stimulus, and post-movement).

305

306 **Normalization of power spectra:** For each trial, we normalized the power spectrum over all  
307 power values (for each frequency for all electrodes) from all trials in that session. We calculated  
308 the Z Score by subtracting the mean (of all power values from all trials in that session) from  
309 each point and dividing by the standard deviation.

310

311 **Standard Error:** Standard error was defined as  $s/\sqrt{n}$ , where  $s$  is the standard deviation of the  
312 power spectra for several sessions with respect to the sessions, and  $n$  is the number of  
313 sessions. Standard error is shown in shading in plots of power spectra.

314

315 **Split into RT quantiles:** We first calculated the breaks for the RT percentiles for that monkey  
316 on that session, separating the trials with RTs either greater than 85% of trials in that session  
317 and the trials with RTs smaller than 15% of trials in that session. We then averaged the  
318 normalized power spectra over trials within each RT quantile and finally averaged over all  
319 electrodes within each quantile. Then within each quantile, we averaged over all sessions,  
320 giving two normalized grand average power spectra each over all trials, channels, and sessions.

321

322 **Correlation between BBA and RT:** For each electrode, per session of data (several trials), we  
323 computed the partial Spearman correlation between the normalized power at each frequency  
324 with reaction time, controlling for the coherence of the checkerboard. We then averaged the  
325 correlations over all electrodes and all sessions. Significance of the correlation values were  
326 adjusted using the Benjamini & Hochberg (Benjamini and Hochberg, 1995) procedure for  
327 controlling the false discovery rate (FDR) of a family of hypothesis tests (Groppe, 2016).

328

329 We decided to do a partial correlation in order to control for the confounding variable, the  
330 coherence of the checkerboard, which we know affects the RT and also likely affects the LFP  
331 power spectra and would therefore have otherwise given misleading correlation values.

332

333 **Simulating Relationships between BBA and RT:** In order to clarify the mathematical  
334 relationship between BBA and RT, we ran a series of simulations (Fig. 6). We first randomly  
335 generated an RT value within the range typically observed for our monkeys. Then, we created a  
336 variety of LFP signals in which the frequency and amplitude were either constant or related in  
337 some way to the RT that was generated. The relationship between frequency, amplitude, and  
338 RT are specified in the equations below, where  $\text{randn}$  signifies a random number drawn from  
339 the normal distribution. Within each frequency and amplitude relationship, we generated one  
340 thousand RTs and corresponding LFP signals. We then calculated the power spectrum for each  
341 simulated LFP signal before correlating the power spectra to the randomly generated RT. Each  
342 frequency and amplitude relationship resulted in a different correlation with RT. The equations  
343 below match the panels shown in Fig. 6.

344

345 i: Frequency =  $28 + 1.2 \cdot \text{randn} + .003 \cdot \text{RT}$ ; Amplitude = 1;



346 **ii:** Frequency =  $28 + 1.2 \cdot \text{randn} - .003 \cdot \text{RT}$ ; Amplitude = 1;  
347 **iii:** Frequency =  $28 + 1.2 \cdot \text{randn} - .003 \cdot \text{RT}$ ; Amplitude =  $.3 + 5e-6 \cdot \text{RT}$ ;  
348 **iv:** Frequency =  $28 + 1.2 \cdot \text{randn} - .003 \cdot \text{RT}$ ; Amplitude =  $.3 - 5e-6 \cdot \text{RT}$ ;  
349 **v:** Frequency =  $28 + 1.2 \cdot \text{randn}$ ; Amplitude =  $.3 + 5e-6 \cdot \text{RT}$ ;  
350 **vi:** Frequency =  $28 + 1.2 \cdot \text{randn}$ ; Amplitude =  $.3 - 5e-6 \cdot \text{RT}$ ;  
351  
352  
353  
354  
355  
356

## 357 RESULTS

358

359 Two trained monkeys (T and O) discriminated the dominant color of a central, static  
360 checkerboard cue composed of mixtures of red and green squares and used an arm movement  
361 to report the decision (Fig. 2a, Coallier et al., 2015). Fig. 2b depicts a trial timeline. The trial  
362 began when the monkey touched the center target and fixated on the cross. After a variable  
363 target viewing period, the red-green checkerboard cue appeared. The task of the monkey was  
364 to make an arm movement toward the target (red vs. green) that matched the dominant color of  
365 the checkerboard cue. We parameterized difficulty of the discrimination (example stimuli shown  
366 in Fig. 2c) by a color coherence measure (C) defined as the absolute difference in the number  
367 of red and green squares normalized by the total number of squares in the checkerboard ( $C =$   
368  $100 * |R - G| / (R + G)$ ). A corresponding signed color coherence measure (SC) is defined as  $SC =$   
369  $100 * (R - G) / (R + G)$ . We previously reported the behavior of the monkeys while they performed  
370 this task (Chandrasekaran et al., 2017). Here we present the psychometric and chronometric  
371 curves for the sessions where we examined the LFP.

372

373 On average across sessions, decreases in color coherence resulted in more errors (Fig.  
374 2d). We fit the proportion correct as a function of unsigned coherence (C) using a weibull  
375 function to estimate slopes and thresholds (average  $R^2$ , T: .99 (over 24 sessions, 47483 trials),  
376 O: .99 (over 44 sessions, 70250 trials), slope ( $\beta$ ),  $M \pm SD$  over sessions, T:  $1.30 \pm 0.16$ , O:  $1.26 \pm$   
377  $0.15$ ). Monkey T displayed more sensitivity than Monkey O (thresholds are computed on a per-  
378 session basis and averaged over sessions at 81.6% correct, ( $M \pm SD$ ): T,  $9.87\% \pm 1.12\%$ , O:  
379  $15.05 \pm 1.79\%$ , two-tailed test, Wilcoxon rank sum comparing median thresholds,  $p = 1.292e-11$ ).

380

381 A decrease in color coherence also resulted in a slower mean RT (Fig. 2e, using a  
382 regression to test if mean RT increases as  $\log_e$  coherence decreases (harder stimulus  
383 difficulties as in (Roitman and Shadlen, 2002); average  $R^2$ , T: 0.94, O: 0.59; slope of regression:  
384  $M \pm SD$  over sessions, T:  $-41.1 \pm 6.3$  ms/ $\log_e$  coherence (%), O:  $-8.6 \pm 4.5$  ms/ $\log_e$  coherence (%)).  
385 Monkey T had a larger range of RTs compared to Monkey O (Comparing the RT range between  
386 easiest and hardest difficulties ( $M \pm SD$ ) estimated over sessions; T:  $115 \pm 19$  ms and O:  $28 \pm 11$   
387 ms, Wilcoxon ranksum comparing median ranges of RT,  $p = 1.292e-11$ ).

388

389 Although color coherence explains considerable variation in RT, there is significant  
390 variation that is not explained by the coherence. A linear regression between RT and stimulus  
391 coherence only explained 10.8% of the variance in monkey T and only 1.3% in monkey O.  
392 Variation in RT is readily apparent even within a given color coherence (Fig. 2f). Our hypothesis  
393 is that this RT variability is at least in part related to fluctuations in BBA (See Figure 1,  
394 Pogosyan et al., 2009; Kilavik et al., 2012; Khanna and Carmena, 2017).

395

### 396 LFP and neuronal responses during the pre-stimulus period show prominent beta band 397 activity

398

399 We first examined our LFPs recorded in PMd, specifically examining how the power across  
400 different frequencies of the LFP changed throughout the reach decision task. BBA is apparent in

401 the pre-stimulus period (600 ms before the appearance of the checkerboard the stimulus),  
402 decreases during the decision-formation period, and remains low during the movement epoch  
403 (Fig. 3a, 3b). This pre-stimulus increase in power in the 15-35 Hz range is consistent with the  
404 definition of BBA in both frequency (from 15 to 35 Hz) and timing within task behavior (Sanes  
405 and Donoghue, 1993; Baker et al., 1997; Kilner et al., 1999; Riddle and Baker, 2006; Rubino et  
406 al., 2006; Baker, 2007; Klostermann et al., 2007; Chakarov et al., 2009; Zaepffel et al., 2013).  
407 Decreases in BBA after movement onset are also consistent with these and other prior reports  
408 of beta event related desynchronization. Finally, activity in the delta band (0.5 to 4 Hz), theta  
409 band (4 to 7 Hz), and alpha band (8 to 12 Hz) are present both before and after checkerboard  
410 onset (Fig. 3a). We found that there was essentially no activity in the gamma band (40-100 Hz)  
411 (Fig. 3a).

412  
413 Several other analyses confirmed the existence of BBA during the pre-stimulus period.  
414 Temporal fluctuations in the beta band were readily visible in individual trials of the LFP  
415 suggesting that we are not artificially separating a broadband signal into signals of a specific  
416 frequency (Fig. 3c). The power spectra for the trials shown in Fig. 3c corroborated this  
417 observation of signals in the 15-35 Hz range (Fig. 3d). Finally, pre-stimulus BBA was  
418 consistently observed in our population recordings (Fig. 3e & 3f). Figs. 3e & 3f plot the average  
419 power spectrum over all trials, electrodes, and sessions for three different task periods: pre-  
420 checkerboard cue, post-checkerboard cue, and post-movement. Both monkeys show significant  
421 BBA during the pre-stimulus period, each with peak frequencies slightly below 30 Hz.

422  
423 Across both monkeys, BBA observed after the checkerboard (during the post-  
424 checkerboard period) differs from pre-stimulus BBA (Fig. 3e & 3f). After the checkerboard, BBA  
425 has decreased peak power and a broader peak (covering more frequencies). The frequencies  
426 present are still consistent with the frequency definition of BBA.

#### 427 428 **RT covaries with BBA frequency and power**

429  
430 Our first goal in this study was to better understand the relationship between BBA from the pre-  
431 and post-stimulus periods and behavior. First, we examined if there were significant  
432 relationships between pre-stimulus BBA and RT. As an initial, exploratory analysis, we  
433 examined the extremes of the data by splitting the data into the (fastest) trials with the smallest  
434 15% of RTs and the (slowest) trials with the largest 15% of RTs and compared the average  
435 power spectra of the two groups for each monkey. Using the 5th and 95th percentiles suggested  
436 similar patterns. Across both monkeys during the pre-stimulus period, we found that the faster  
437 RTs have more power in the higher frequencies of BBA (approximately 25 to 30 Hz) (Fig. 4a &  
438 4b). In Monkey T, in the lower frequencies of BBA (approximately 15 to 25 Hz), the slower RTs  
439 have more power. Combined, this leads to a frequency shift between the RT quantiles, with the  
440 power spectra for the slower RT trials slightly shifted towards the lower frequencies. In Monkey  
441 O, however, the faster (smallest) RTs have more power for both the low and high frequencies of  
442 BBA, so the perceived shift is not present.

443

444 To more rigorously quantify this relationship between RT and pre-stimulus BBA, we  
445 examined the correlation between these two variables at each and every frequency. We  
446 performed this analysis using partial correlations; i.e., we estimated the correlation between pre-  
447 stimulus BBA and RT while using checkerboard coherence as a covariate. We then averaged  
448 the partial correlations over the 16 electrodes. Correlation analyses exploiting the simultaneous  
449 nature of our recordings were not notably different from the averaging analysis. So we only  
450 report the results obtained from averaging partial correlations over electrodes.

451  
452 Our analysis suggested a positive correlation between BBA and RT around 15 Hz (T:  
453 peak at approx. 16 Hz,  $r = 0.0785$ ,  $p = 9.9341e^{-7}$ ; O: peak at approx. 12 Hz,  $r = 0.0214$ ,  $p =$   
454  $0.0056$ ) and a negative correlation between BBA and RT around 35 Hz (T: minimum at approx.  
455 31 Hz,  $r = -0.1278$ ,  $p = 9.9341e^{-7}$ ; O: not significant) (Fig. 4c & 4d). The presence of significant  
456 correlations is inconsistent with the postural holding hypothesis. However, varying correlations  
457 by frequency support both the maintenance hypothesis (purely positive correlations with BBA)  
458 and the attentional hypothesis (purely negative correlations with BBA) within different sub-  
459 regions of the beta band (maintenance for low BBA and attentional for high BBA).

460  
461 We next performed the same analyses on the post stimulus (post-checkerboard) BBA to  
462 better understand its relation to RT. Across both monkeys during the post-stimulus period, we  
463 see that the slower (larger) RTs (85th percentile) have more power in the lower frequencies of  
464 BBA (approximately 15 to 25 Hz) (Fig. 5a & 5b). In Monkey O, in the higher frequencies of BBA  
465 (approximately 25-35 Hz), the faster (smaller) RTs have more power. Combined, this leads to a  
466 frequency shift between the RT quantiles, with the power spectra for the slower RT trials slightly  
467 shifted towards the lower frequencies. In Monkey T, however, the slower (larger) RTs have  
468 more power for both the low and high frequencies of BBA, so the perceived shift is not present.  
469 Across both monkeys, the correlation between post-stimulus activity and RT is positive for both  
470 low and high beta (as well as some high alpha) (T: peak at approx. 21 Hz,  $r = 0.13$ ,  $p = 3.3114e^{-7}$ ;  
471 O: peak at approx. 21 Hz,  $r = 0.1167$ ,  $p = 8.1205e^{-13}$ ) (Fig. 5c & 5d). The correlation is  
472 negative for gamma activity in the low gamma band (T: minimum at approx. 37 Hz,  $r = -0.06$ ,  $p =$   
473  $3.3114e^{-7}$ ; O: minimum at approx. 47 Hz,  $r = -0.0708$ ,  $p = 5.8103e^{-9}$ ).

474  
475 These results for the post-stimulus period can also be more broadly viewed as a shift in  
476 the component frequencies of the LFP, this time across multiple frequency bands. That is, on  
477 faster RT trials, there is less overall beta band activity and slightly more gamma band activity.  
478 The opposite is true for the slower RTs.

479  
480 **Simulations suggest that a frequency shift in BBA is a plausible mechanism for the**  
481 **observed pattern of correlation**

482  
483 In order to better understand the mechanisms behind the frequency dependent correlation  
484 between BBA and RT, we used a simulation analysis. The schematic for this analysis is shown  
485 in Fig. 6a. First, we randomly generated RT values within the range of RTs typically observed  
486 for our monkeys. Then, based on these values and a variety of governing equations for

487 frequency and amplitude, we simulated LFP signals for these hypothetical trials. The signal was  
488 defined as

$$489 \quad \text{signal} = \text{Amplitude} * \sin(2\pi * \text{Frequency} * t),$$

491  
492 where amplitude and frequency are either constants, linear increasing functions of RT, or linear  
493 decreasing functions of RT. We then calculated the power spectra of these simulated signals  
494 from these trials and correlated these power spectra to their corresponding RTs. For each group  
495 of frequency and amplitude equations, we generated one thousand simulated trials with  
496 corresponding RTs, simulated LFP signals, and power spectra. The correlation coefficient as a  
497 function of frequency between the simulated power spectra and RTs is shown in Fig. 6b for the  
498 six paradigms.

499  
500 The correlations between pre-stimulus BBA and RT observed in the real data (shown in  
501 Fig. 4c & 4d) most closely match the correlation when frequency is negatively related to RT.  
502 This relationship is robust regardless of the relationship between amplitude and RT (shown in  
503 Fig. 6b parts ii, iii, and iv). These findings indicate the presence of a relationship between pre-  
504 stimulus BBA frequency composition and RT, suggesting that pre-stimulus BBA component  
505 frequencies are negatively related with RT.

506  
507 The correlations between post-stimulus BBA and RT observed in the real data (shown in  
508 Fig. 5c & 5d) most closely match the correlation when frequency is not related to RT and  
509 amplitude is positively related to RT (shown in Fig. 6b, part v). This indicates the presence of a  
510 relationship between post-stimulus BBA amplitude and RT with no relationship between post-  
511 stimulus BBA component frequencies and RT. We do recognize though that additional  
512 processes that involve the dynamical balance between beta band activity and gamma band  
513 activity can lead to shifts in the frequencies that, in turn, explain the negative correlations in the  
514 gamma band but positive correlations in the beta band.

515  
516 **Deeper cortical layers have stronger activity in the low beta range than the superficial**  
517 **layers**

518  
519 The next goal of our study was to understand how BBA changes as a function of cortical depth.  
520 The use of linear multi-contact electrodes (Fig. 2g) provided us with simultaneous recordings  
521 across several cortical depths and allowed us to examine whether there was a relationship  
522 between cortical depth and BBA.

523  
524 To examine the degree to which pre-stimulus power in the beta region varied with  
525 electrode depth, we divided the electrodes into two groups: the superficial (electrodes 1:8) and  
526 the deep (electrodes 9:16). In both monkeys, deeper electrodes (corresponding to deeper  
527 cortical layers) have more power around the 10 to 20 Hz region (Fig. 7a & 7b). In one monkey  
528 (Monkey O), this pattern of deeper electrodes having more power than surface electrodes  
529 continues from approximately 10 Hz until 30 Hz, slightly past its peak frequency (Fig. 7b).

530

531            This pattern of deeper electrodes having more power than surface electrodes around the  
532 10-20 Hz (low beta) region is also true of the post-stimulus period and is even more pronounced  
533 (Fig. 8a & 8b). Again in Monkey O, the pattern of deeper electrodes having more power than  
534 surface electrodes continues slightly past its peak frequency (Fig. 8b).

535

#### 536 **Correlation between BBA and RT does not vary significantly by depth**

537

538 To examine whether BBA from certain cortical layers was more strongly tied with RTs, we  
539 performed the correlation with RT over two depth groups: superficial (electrodes 1:8) and deep  
540 (electrodes 9:16). For both pre-stimulus (Fig. 7c & 7d) and post-stimulus (Fig. 8c & 8d) BBA, the  
541 correlations for each group of electrodes produced the same shape as the correlation over all  
542 electrodes shown previously. The correlations for the superficial and deep electrodes are  
543 essentially the same, i.e. the correlation for one depth group is not significantly greater in  
544 magnitude than that of the other.

545

546

547 **DISCUSSION (1476 words; 1500 words max)**

548

549 The motivation for our study was to further understand the behavioral relevance of BBA and  
550 how it is organized as a function of cortical depth. In a perceptual decision-making task, we  
551 found that BBA was robustly present during the pre-stimulus and post-stimulus periods and was  
552 related to the behavioral RT. During the pre-stimulus period, low beta frequencies (~15 to 20  
553 Hz) were positively correlated with RT, while high beta frequencies (~25 to 30 Hz) were  
554 negatively correlated. Through simulation, we found that the observed frequency-dependent  
555 correlation corresponds to a negative relationship between RT and the component frequencies  
556 of pre-stimulus BBA. During the post-stimulus period, all frequencies of BBA (~15-30 Hz) were  
557 positively correlated to RT. We also found that deeper electrodes had higher power in the low  
558 beta frequencies (~15 to 20 Hz) than superficial electrodes for both the pre- and post-stimulus  
559 periods.

560

561 **“Maintenance of current state” and “attentional” hypotheses help explain BBA in PMd**

562

563 The nuanced relationship we discovered between BBA and RT is relevant for the ongoing  
564 discussion regarding the role of BBA. Currently, three main hypotheses exist, and each  
565 hypothesis has corresponding expected relationships between BBA and RT.

566

567 The postural hypothesis posits that BBA is a result of the maintained holding of a hand  
568 position and has no relationship to eventual behavior. For our experiment, one would predict no  
569 relationship between BBA and RT (Baker et al., 1999; Kristeva et al., 2007) – a hypothesis  
570 inconsistent with our findings that both pre-stimulus and post-stimulus BBA were related to RT.

571

572 Correlations between BBA and RT during the pre-stimulus period support both of the two  
573 remaining hypotheses. The maintenance hypothesis asserts that BBA represents a willingness  
574 to maintain the current state of either rest or movement. In this hypothesis, greater levels of  
575 BBA reflect the “desire” to maintain the hold position, which would result in slower movement  
576 and an increase in RT (Gilbertson et al., 2005; Pogosyan et al., 2009; Engel and Fries, 2010).  
577 Our finding of a positive correlation between BBA and RT for low beta frequencies is consistent  
578 with the maintenance hypothesis. The attentional hypothesis, which suggests that greater BBA  
579 reflects more attentional engagement with the task, would suggest a negative correlation  
580 between BBA and RT (Bouyer et al., 1987; Murthy and Fetz, 1992; Zhang et al., 2008; Saleh et  
581 al., 2010). The negative correlation between BBA and RT for high beta frequencies supports the  
582 attentional hypothesis.

583

584 During the post-stimulus period, we found that BBA was positively correlated with RT for  
585 both low and high frequencies, which supports the maintenance hypothesis. During this period,  
586 it appears that BBA of any frequency (low or high) reflects more willingness to maintain the  
587 current state of being.

588

589 This constellation of results suggest that the beta band is not a monolithic signal and  
590 consists of activity in at least two frequency sub-bands that dynamically emerge in different task

591 epochs, perhaps reflecting distinct behavioral demands placed on the animal (Buschman et al.,  
592 2012; Spitzer and Haegens, 2017). We expand on this theme in the next section.

593

### 594 **BBA is better understood when split into two frequency bands**

595

596 By examining the correlation at each frequency, rather than averaging over the whole beta  
597 frequency band, we found that BBA is better understood as being composed of at least two  
598 frequency sub-bands: low beta (~13 to 20 Hz) and high beta (~25 to 30 Hz).

599

600 Our nuanced view of BBA has some precedent in literature, with human EEG and rat  
601 studies referring to a beta1 band (~ 15 Hz) and a beta2 band (~ 25 Hz) (Haenschel et al., 2000;  
602 Kramer et al., 2008; Kopell et al., 2011; Cannon et al., 2014). In monkeys, Kilavik and  
603 collaborators examined motor cortical BBA during a visual multiple delay reaching task and  
604 suggested a similar separation (Kilavik et al., 2012). They posited that low beta frequencies  
605 were the result of widespread networks involved in top-down (conscious) processing and  
606 expectation of movement-related visual information, while higher beta frequencies emerged  
607 from bottom-up visual information processing and movement preparation (Kilavik et al., 2012).

608

609 The pre-stimulus period of our task incorporates the behavioral components identified by  
610 Kilavik and collaborators for both types of BBA – the monkey is expecting the visual  
611 checkerboard stimulus, is viewing relevant reach targets, and is preparing for one of two arm  
612 movements. We take the stance that the frequency composition of the pre-stimulus period  
613 reflects these different processes in the decision-making task. Therefore, it is not unreasonable  
614 that we see both low and high beta frequencies and positive and negative correlations between  
615 BBA and RT.

616

617 As the task progresses, the visual checkerboard (a bottom-up visual stimulus) appears.  
618 We speculate that the appearance of the checkerboard triggers a cognitive process that  
619 involves deliberation on the visual stimulus and likely movement preparation for the arm  
620 movement to report the decision. In the framework proposed by Kilavik and collaborators, such  
621 processes should induce activity in multiple beta frequencies, which is consistent with the  
622 broader frequency range of BBA we see in the post stimulus period. It remains to be understood  
623 why increased beta of any frequency during this period is associated with slower RTs.

624

### 625 **Beyond the LFP**

626

627 Our study has focused on BBA in the LFP and behavior. We chose to analyze the LFP because  
628 it provides a population level, spatially averaged description of neural activity. We anticipate  
629 similar effects in spiking neurons, and preliminary analysis of our spike trains suggested BBA in  
630 many neurons and multi-units. However, analysis of single-neuron spike trains is often difficult  
631 because of the mixture of both poisson and non-poisson variability in these spike trains. Typical  
632 noise-reduction steps, such as convolution of spike trains with various filters, end up low pass  
633 filtering spike trains, which would lead to severe attenuation of signals at beta frequencies and  
634 the overemphasis of slower dynamics. We take the view these spikes are emerging from a



635 dynamical system with activity at multiple time scales and that there is a need for collectively  
636 understanding both slow and fast dynamics in spiking activity. Single-trial analysis methods that  
637 use recurrent neural networks would facilitate such analyses (Pandarinath et al., 2017b).

638

### 639 **Greater low frequency beta in deeper electrodes is consistent with hypotheses about the** 640 **generation of BBA**

641

642 We found that electrodes placed deeper in the cortex, whose position approximately  
643 corresponds to layer V, have higher power in the low beta range (~15 to 20 Hz) than  
644 superficially placed electrodes during both the pre- and post-stimulus periods. The power and  
645 depth relation differed across our two monkeys for high beta frequencies (~25 to 30 Hz). The  
646 difference between monkeys for the power and depth relation in higher frequencies could arise  
647 due to variations in recording locations across animals or could be endogenous to the individual.  
648 This possibility would need to be studied with a variety of experiments and a larger test  
649 population.

650

651 Two main hypotheses exist regarding the generation of BBA: it is either generated  
652 locally, perhaps in layer V of motor cortex, or it is generated distally and transmitted from  
653 elsewhere (Khanna and Carmena, 2015; Spitzer and Haegens, 2017). Our finding of greater  
654 power in low beta frequencies for deeper electrodes is consistent with both predominant  
655 hypotheses; greater power could either indicate the BBA being generated in that layer (local  
656 hypothesis), or it could indicate that the distally generated BBA is projected into that layer (distal  
657 hypothesis).

658

659 Few studies have examined relationships between BBA and cortical depth. One study  
660 examined synchronization of BBA at various depths in the inferior temporal cortex during the  
661 passive repetition of visual stimuli (Kaliukhovich and Vogels, 2012). However, the passive  
662 nature of the task meant that they could not relate BBA to behavior. A recent laminar study of  
663 LFPs power in frontal cortex, including PMd, found greater power for low frequencies of BBA in  
664 deeper cortical layers (Bastos et al., 2018) – a result consistent with our observations here.

665

666 Even though few studies focus on how BBA changes as a function of cortical depth,  
667 many have hypothesized about its origin and built computational models (Lee et al., 2013;  
668 Cannon et al., 2014). Despite these studies advancing our understanding of the biophysical  
669 basis of BBA, we still lack clarity about its underlying generators, because these modeling  
670 studies focus on results from in-vitro experiments in sensory cortices, with only one study  
671 focusing on the motor areas. Our study provides some of the first descriptions of BBA in  
672 premotor cortical areas in monkeys performing demanding cognitive tasks that also involve the  
673 somatomotor system. We anticipate that our data showing greater power in the lower  
674 frequencies of BBA will help constrain computational models of BBA. Studies involving laminar  
675 recordings in other BBA associated structures are needed to build the next generation of  
676 computational models of BBA. Ideally, these future studies would include decision-making,  
677 instructed delay, and somatosensory perturbation tasks that engage the different processes that  
678 are postulated to be associated with beta band activity.

679  
680  
681  
682  
683

## FIGURES

**Figure 1**

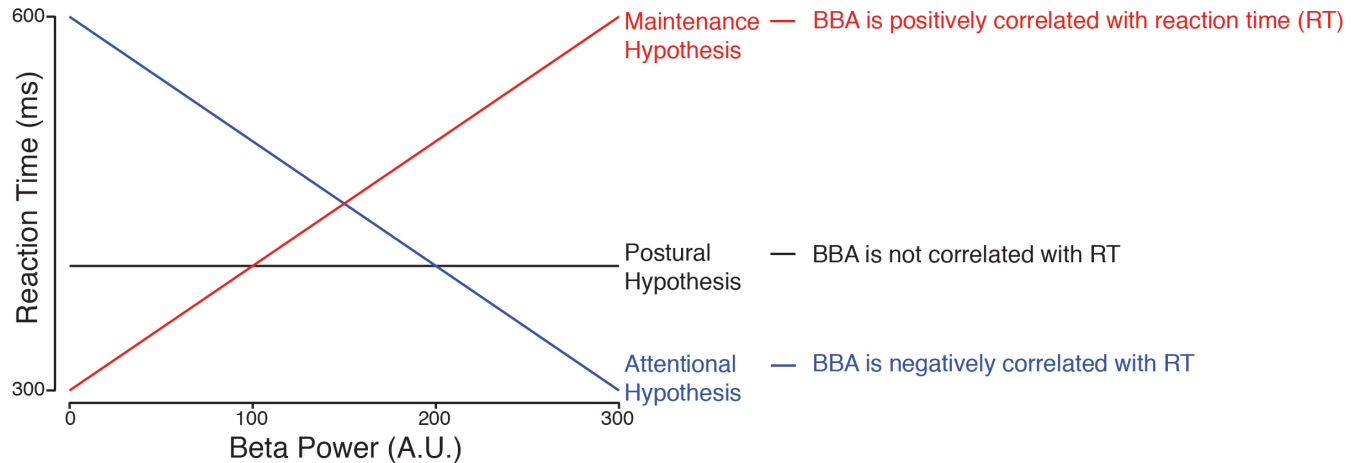

684  
685  
686  
687  
688  
689  
690  
691  
692  
693  
694  
695  
696

**Figure 1 – Existing hypotheses about the role of BBA**

Three existing hypotheses about the relation between pre-stimulus BBA and RT. The black, horizontal line corresponds to the postural hypothesis of BBA, where there is no relationship between BBA and RT. The red, positively sloped line corresponds to the maintenance hypothesis of BBA, because increased BBA would be tied with longer RTs. The blue, negatively sloped line corresponds to the attentional hypothesis of BBA, because more BBA would be tied to greater attention on the task and therefore shorter RTs. Each dot in the figure is a random, hypothetical RT and beta power used to illustrate the relationship between the two.

697 **Figure 2**

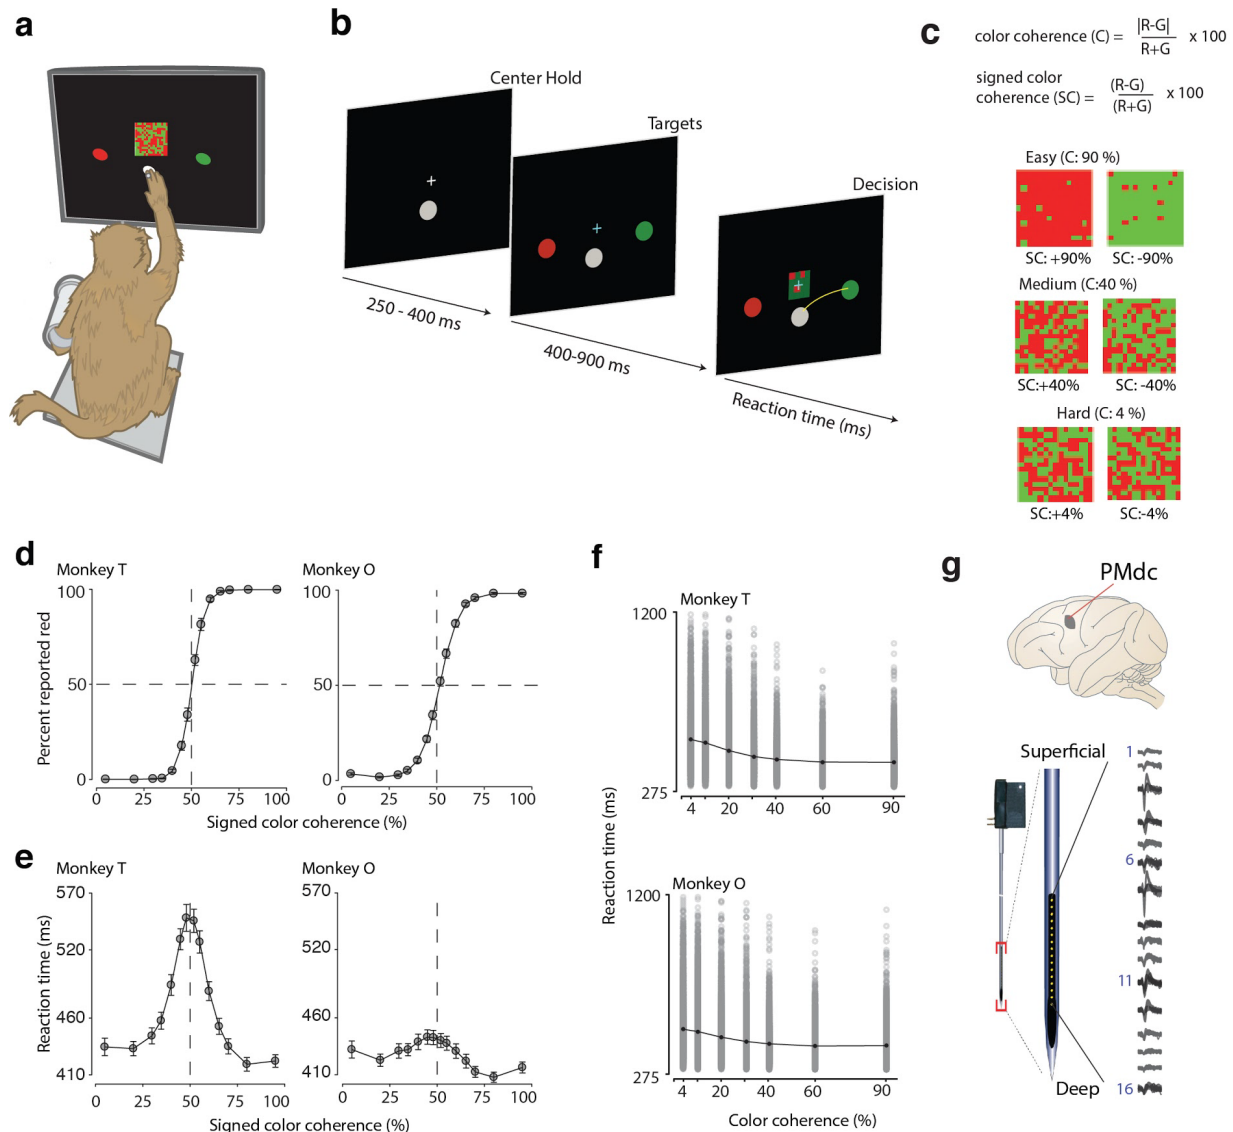

698

699 **Figure 2 – Recording locations, techniques, task, and discrimination behavior**

700

701 **a:** An illustration of the experimental setup for data gathering in the discrimination task. We  
 702 gently restrained the resting arm with a plastic tube and cloth sling. We tracked a reflective IR  
 703 bead taped on the middle digit of the unrestrained hand to mimic a touch screen and to provide  
 704 an estimate of instantaneous arm position. We tracked eye position using an infrared reflective  
 705 mirror placed in front of the monkey's nose.

706

707 **b:** Example timeline of the discrimination task.

708

709 **c:** Examples of different stimulus ambiguities used in the experiment parameterized by the color

710 coherence of the checkerboard defined as  $C = \frac{100 \times |R-G|}{R+G}$ . The corresponding signed color

711 coherence is defined as  $SC = \frac{100 \times (R-G)}{R+G}$ . Positive values of signed color coherence denote

712 more red than green squares and vice-versa.

713

714 **d-e:** Average discrimination performance (d) and reaction time (RT) (e) over sessions of the two  
715 monkeys as a function of the signed color coherence of the checkerboard. RT plotted here  
716 includes both correct and incorrect trials for each session and then averaged across sessions.  
717 Gray markers show measured data points along with 2x(standard error) estimated over  
718 sessions, though variation is so small that they are difficult to see in (d). The black line  
719 segments are drawn in between these measured data points to guide the eye. For most data  
720 points in (d), the error bars lie within the markers. X-axes in both (d) and (e) depict the signed  
721 color coherence in %. Y-axes depict the percent responded red in (d) and RT in (e). Also shown  
722 in (d) are discrimination thresholds ( $M \pm SD$  over sessions) estimated from a Weibull fit to the  
723 overall percent correct as a function of coherence. The discrimination threshold is the color  
724 coherence level at which the monkey made 81.6% correct choices. 24 sessions for monkey T  
725 (47483 trials) and 44 sessions for monkey O (70,250 trials) went into these averages.

726

727 **f:** RT as a function of checkerboard coherence. For each coherence, the mean RT is shown in  
728 black and connected linearly, with gray markers showing individual RTs. There is large variation  
729 of RTs both across and within coherences.

730

731 **g:** Location of PMd along with an example recording from a 16 electrode, 150  $\mu\text{m}$  spacing U-  
732 probe.

733

734

735

736 **Figure 3**

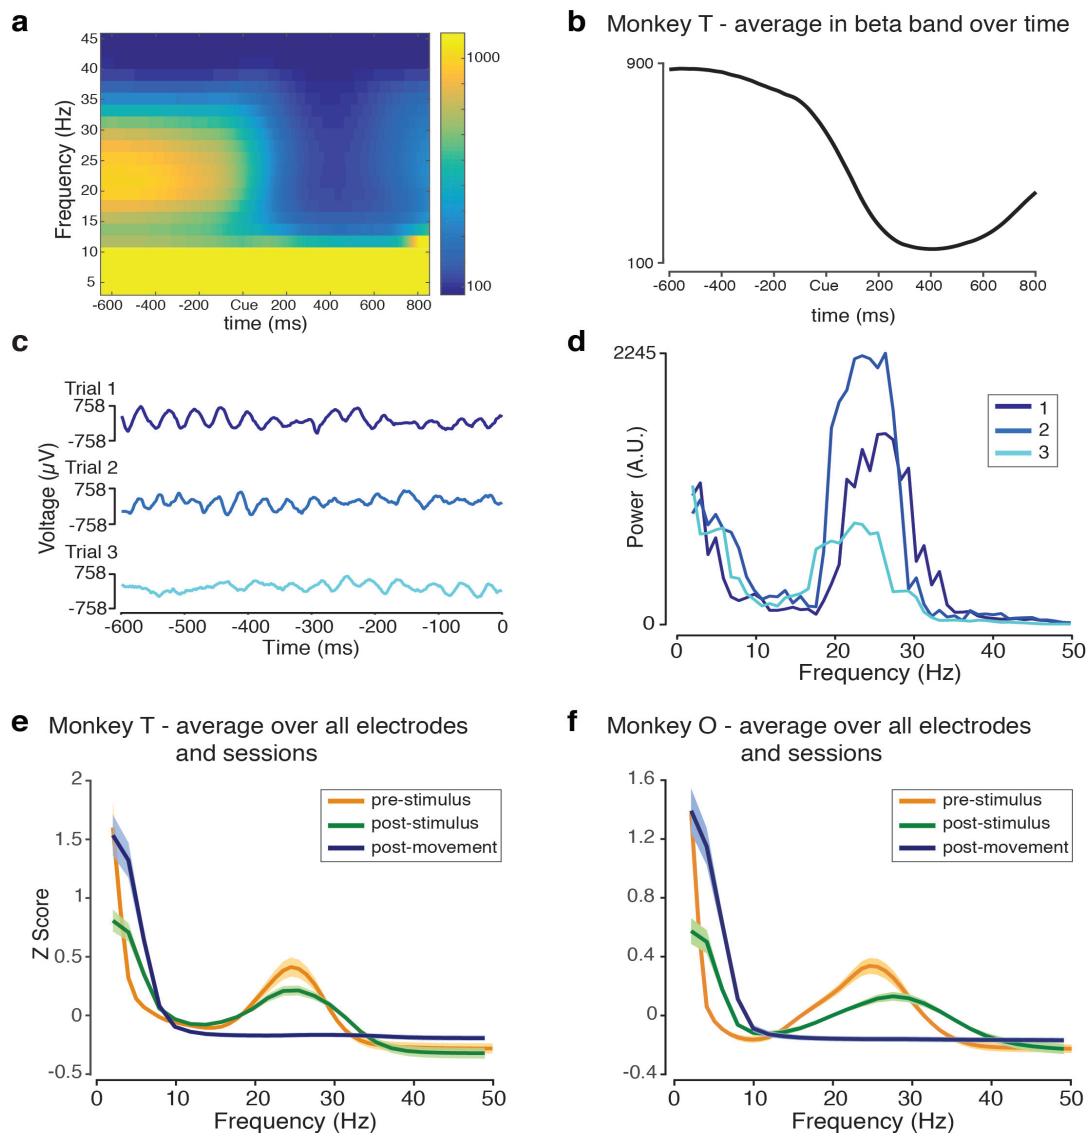

737

738 **Figure 3 – Existence of BBA during hold period before the visual stimulus**

739

740 **a:** Spectrogram aligned to checkerboard onset (indicated with Cue), averaged over all  
741 electrodes, trials, and sessions for Monkey T. The Y-Axis represents frequency and is shown in  
742 Hertz. The X-axis represents time in milliseconds. Color represents power in arbitrary units  
743 (A.U.). Clear presence of pre-stimulus BBA is seen, with lower-power post-stimulus BBA.  
744

745 **b:** Activity in the beta band (13-30 Hz) over time, averaged over all electrodes, trials, and  
746 sessions for Monkey T. The Y-Axis is power in (A.U.) and the X-axis represents time in  
747 milliseconds.  
748

749 **c:** The LFP time series of three trials of Electrode 2 during a single session. The colors are  
750 unique to each trial and consistent with subplot (d). The time series are shown as microvolts per

751 millisecond.

752

753 **d:** Power spectra of three example trials during the epoch before the checkerboard. Power in  
754 (A.U.) is plotted against frequency (Hertz).

755

756 **e-f:** Normalized power spectra of the LFP during the epoch before the checkerboard (orange),  
757 after the checkerboard (green), and after movement (blue). (e) Monkey T grand average over all  
758 electrodes, trials and sessions. (f) Monkey O grand average over all electrodes, trials, and  
759 sessions. The power spectra have been normalized, and their Z Scores are plotted against  
760 frequency (Hertz). Standard error over sessions is shaded.

761 **Figure 4**

**a** Monkey T

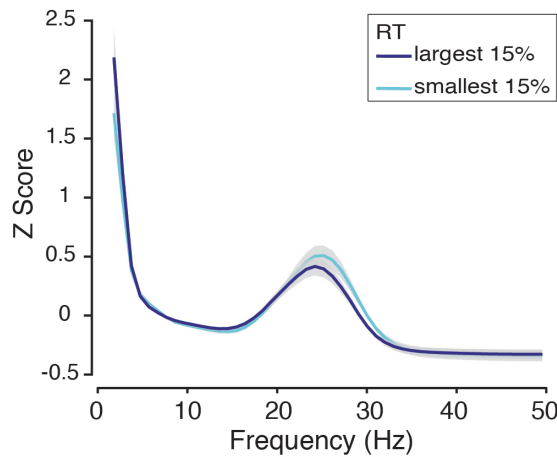

**b** Monkey O

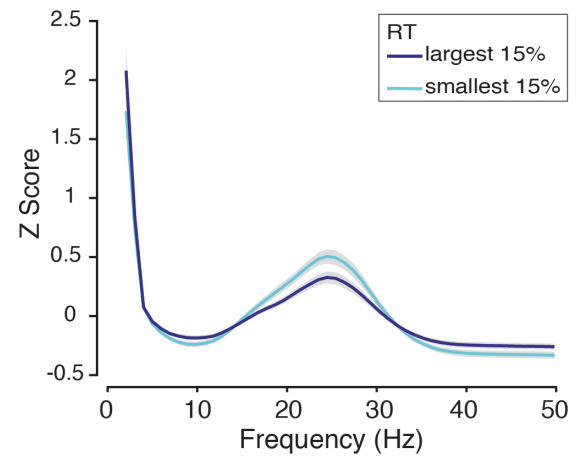

**c** Monkey T

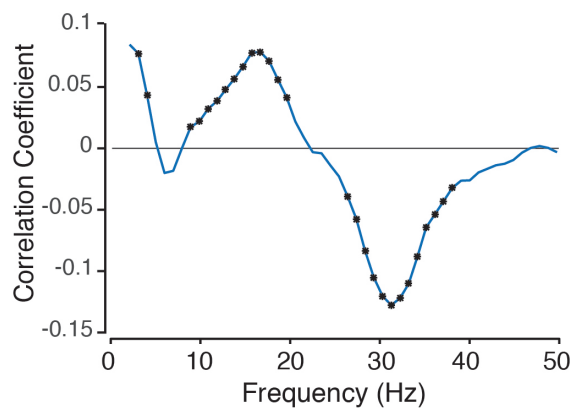

**d** Monkey O

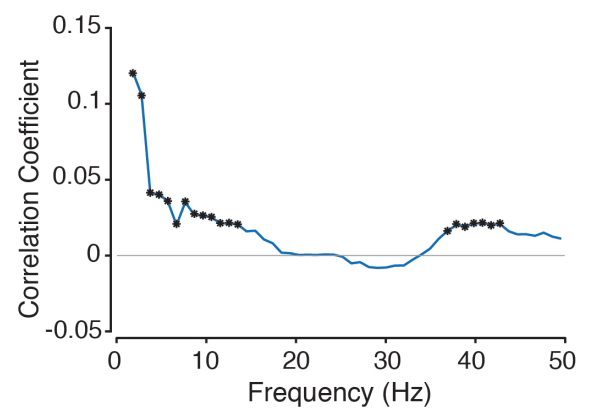

762

763

**Figure 4 – Relation between pre-stimulus BBA and Reaction Time**

764

765

766

767

768

769

770

771

772

773

774

775

776

**a,b:** Normalized pre-stimulus power spectra grouped into two reaction time quantiles and averaged over all trials within that group, all electrodes, and all sessions for Monkey T (a) and Monkey O (b). The two quantiles are the 15% largest (slowest) reaction times and the 15% smallest (fastest) reaction times. The power spectra have been normalized and their Z Scores are plotted against frequency (Hertz). Standard error over sessions is shown in gray.

**c,d:** Correlation between normalized pre-stimulus power spectra with RT as a function of frequency for Monkey T (c) and Monkey O (d). Asterisks indicate points along the curve where the correlation is significant (adjusted p-value less than 0.05).

777 **Figure 5**

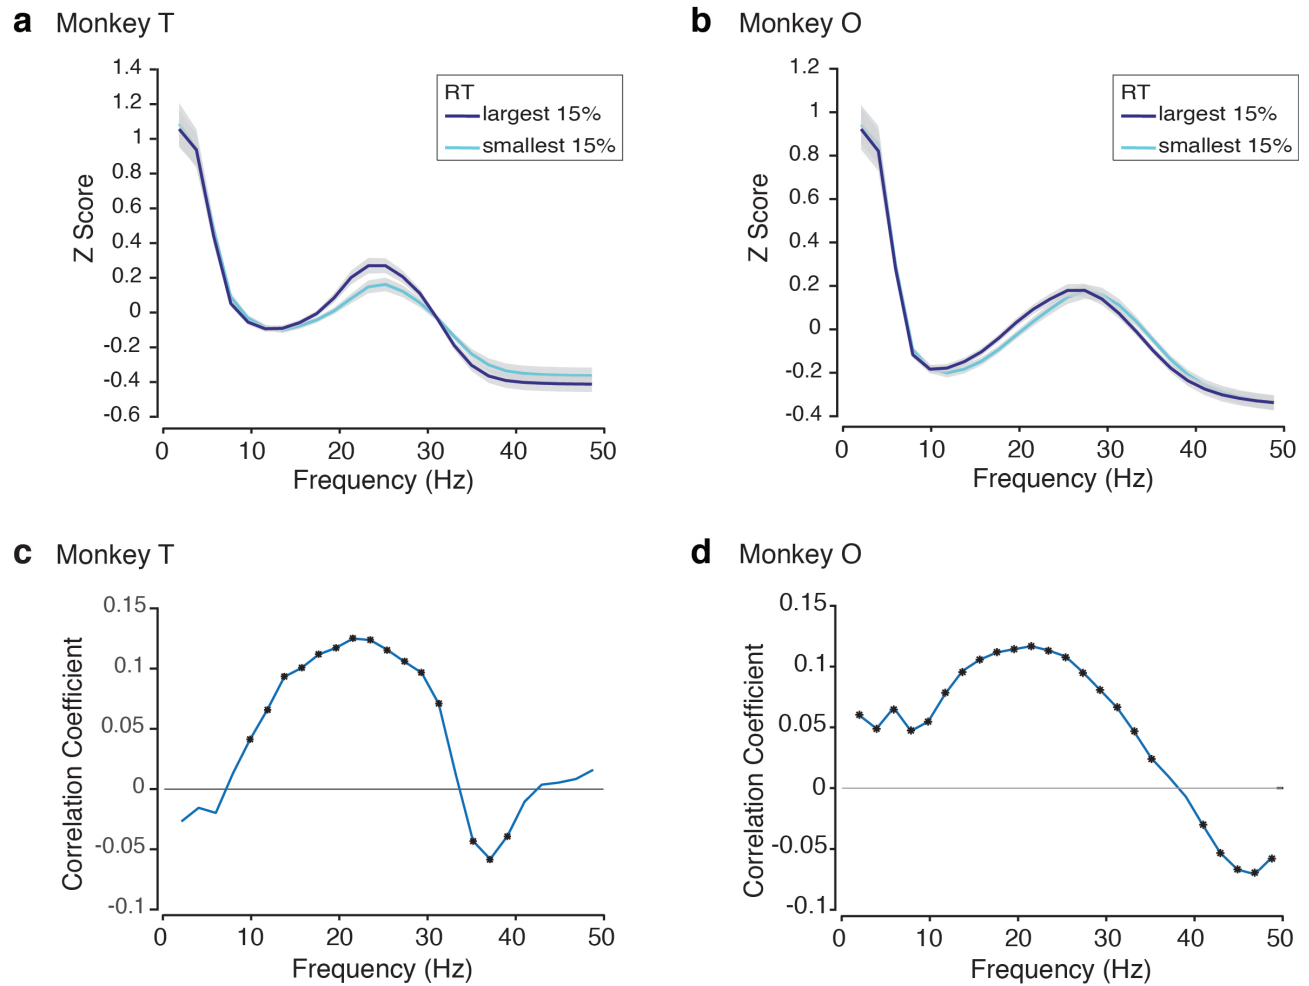

778

779 **Figure 5 – Relation between post-stimulus BBA and Reaction Time**

780

781 **a,b:** Normalized post-stimulus power spectra grouped into two reaction time quantiles and  
782 averaged over all trials within that group, all electrodes, and all sessions for Monkey T (a) and  
783 Monkey O (b). The two quantiles are the 15% largest (slowest) reaction times and the 15%  
784 smallest (fastest) reaction times. The power spectra have been normalized and their Z Scores  
785 are plotted against frequency (Hertz). Standard error over sessions is shown in gray.  
786

787

788 **c-e:** Correlation between normalized post-stimulus power spectra with RT as a function of  
789 frequency for Monkey T (c) and Monkey O (d). Asterisks indicate points along the curve where  
790 the correlation is significant (adjusted p-value less than 0.05).  
791

790

791



792 **Figure 6**

**a**

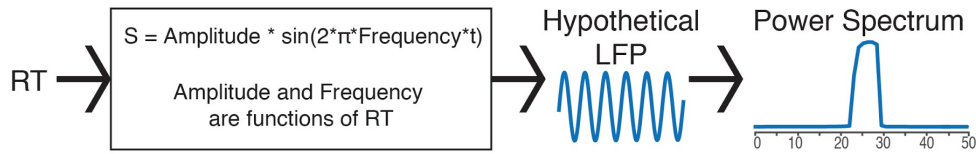

**b** Correlation ( RT, Power Spectrum )

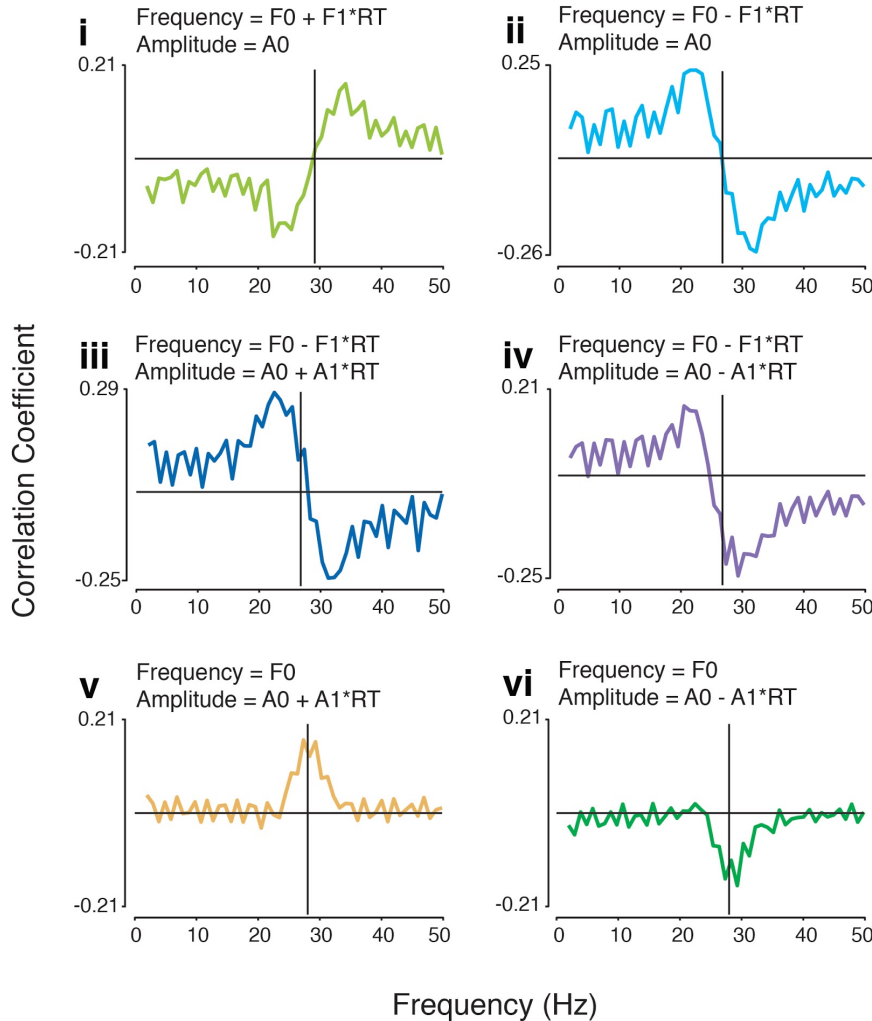

793  
794  
795

**Figure 6 - Simulations of Relation between BBA and Reaction Time**

796 Process (a) and results (b) of a simulation that generated synthetic LFP signals as  
797  $Amplitude * \sin(2 * \pi * Frequency * t)$ . The Amplitude and Frequency of the LFP were defined  
798 differently for each case, either as a constant or a function of reaction time. Power spectra were  
799 made from these LFP signals, and they were then correlated with RT to create the shown plots  
800 of correlation coefficients as a function of frequency for each of the six cases. The amplitude  
801 and frequency relationships with RT for each case are shown with the correlations.

802 **Figure 7**

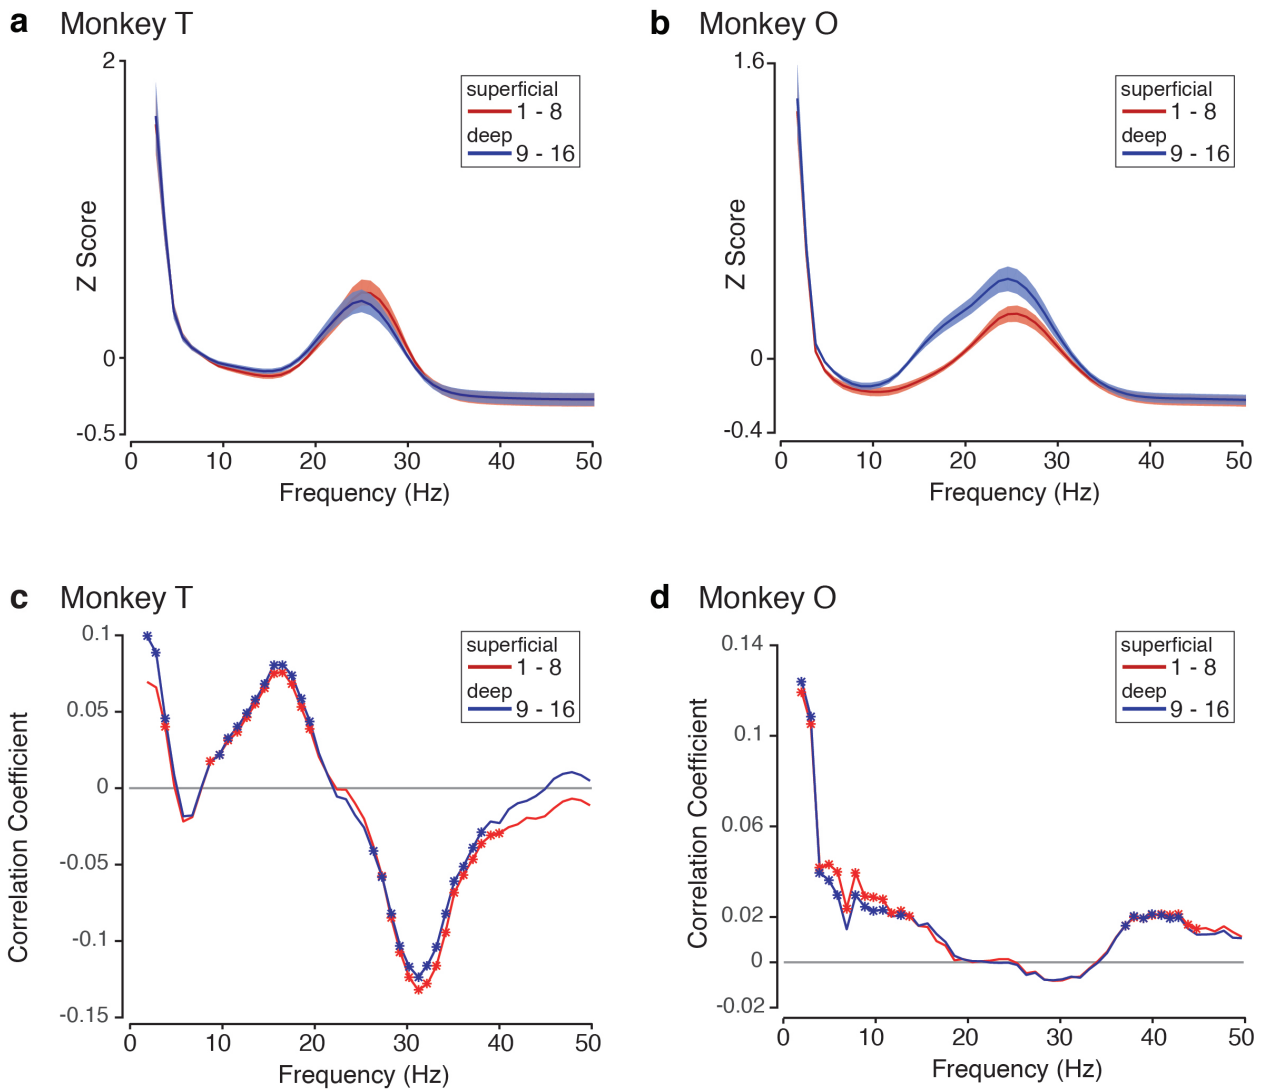

803

804 **Figure 7 – Pre-stimulus BBA by depth**

805

806 **a,b:** Normalized pre-stimulus power spectra grouped into two electrode groupings and averaged  
807 over all trials, all electrodes within that group, and all sessions for Monkey T (a) and Monkey O  
808 (b). The power spectra have been normalized, and their Z Scores are plotted against frequency  
809 (Hertz). The average over the superficial electrodes is plotted in red, and the average over the  
810 deep electrodes is plotted in blue. Standard error over sessions is shaded.

811

812 **c,d:** Depth dependent correlation between normalized pre-stimulus power spectra with RT as a  
813 function of frequency for Monkey T (c) and Monkey O (d). The correlation over the superficial  
814 electrodes is plotted in red, and the correlation over the deep electrodes is plotted in blue.

815

816 **Figure 8**

**a** Monkey T

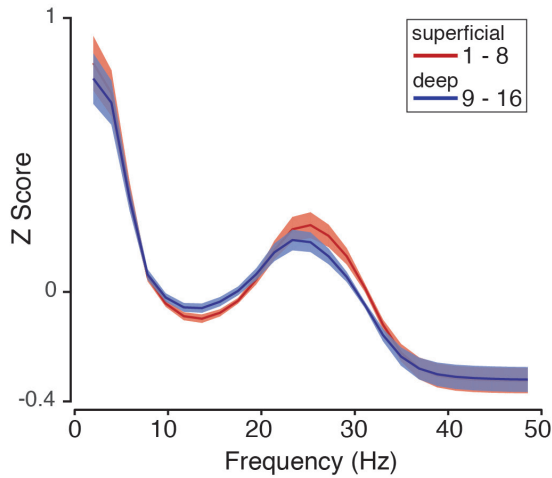

**b** Monkey O

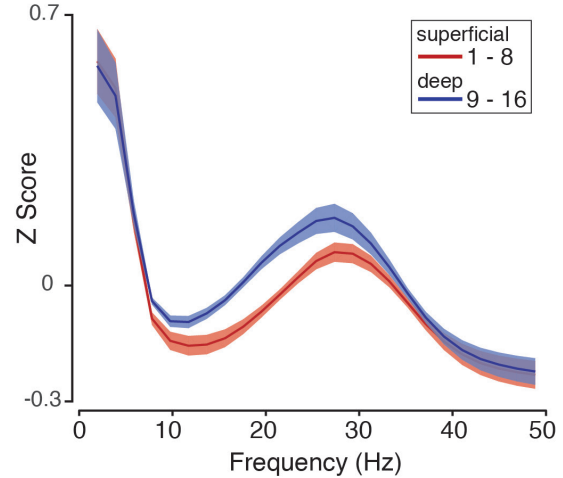

**c** Monkey T

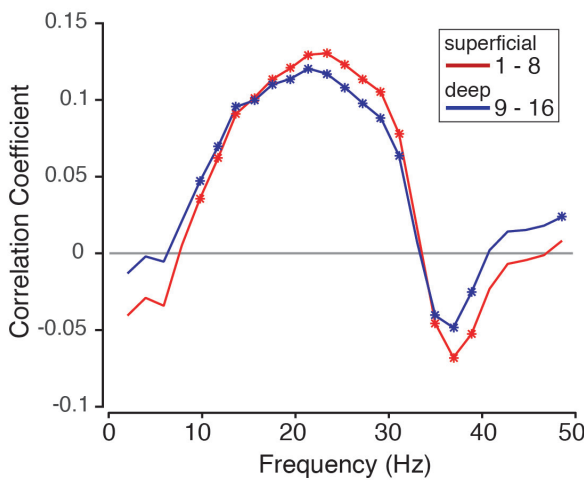

**d** Monkey O

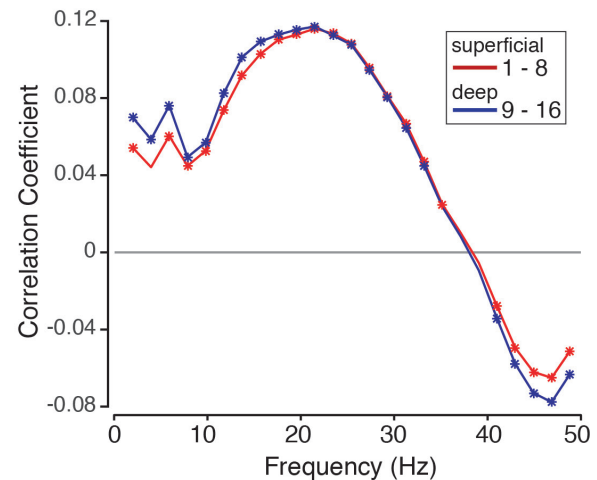

817

818 **Figure 8 – Post-stimulus BBA by depth**

819

820 **a,b:** Normalized post-stimulus power spectra grouped into two electrode groupings and  
821 averaged over all trials, all electrodes within that group, and all sessions for Monkey T (a) and  
822 Monkey O (b). The power spectra have been normalized, and their Z Scores are plotted against  
823 frequency (Hertz). The average over the superficial electrodes is plotted in red, and the average  
824 over the deep electrodes is plotted in blue. Standard error over sessions is shaded.

825

826 **c,d:** Depth dependent correlation between normalized post-stimulus power spectra with RT as a  
827 function of frequency for Monkey T (c) and Monkey O (d). The correlation over the superficial  
828 electrodes is plotted in red, and the correlation over the deep electrodes is plotted in blue.

829

830

831

832 **REFERENCES**

- 833 Bai O, Lin P, Vorbach S, Floeter MK, Hattori N, Hallett M (2008) A high performance  
834 sensorimotor beta rhythm-based brain-computer interface associated with human natural  
835 motor behavior. *J Neural Eng* 5:24–35.
- 836 Baker SN (2007) Oscillatory interactions between sensorimotor cortex and the periphery. *Curr*  
837 *Opin Neurobiol* 17:649–655.
- 838 Baker SN, Kilner JM, Pinches EM, Lemon RN (1999) The role of synchrony and oscillations in  
839 the motor output. *Exp Brain Res* 128:109–117.
- 840 Baker SN, Olivier E, Lemon RN (1997) Coherent oscillations in monkey motor cortex and hand  
841 muscle EMG show task-dependent modulation. *J Physiol* 501 ( Pt 1):225–241.
- 842 Bastos AM, Loonis R, Kornblith S, Lundqvist M, Miller EK (2018) Laminar recordings in frontal  
843 cortex suggest distinct layers for maintenance and control of working memory. *Proc Natl*  
844 *Acad Sci U S A*:201710323.
- 845 Benjamini Y, Hochberg Y (1995) Controlling the False Discovery Rate: A Practical and Powerful  
846 Approach to Multiple Testing. *J R Stat Soc Series B Stat Methodol* 57:289–300.
- 847 Bhatt MB, Bowen S, Rossiter HE, Dupont-Hadwen J, Moran RJ, Friston KJ, Ward NS (2016)  
848 Computational modelling of movement-related beta-oscillatory dynamics in human motor  
849 cortex(). *Neuroimage* 133:224–232.
- 850 Bouyer JJ, Montaron MF, Vahnée JM, Albert MP, Rougeul A (1987) Anatomical localization of  
851 cortical beta rhythms in cat. *Neuroscience* 22:863–869.
- 852 Brittain, Sharott J-S, Brown A, Peter (2014) The highs and lows of beta activity in cortico-basal  
853 ganglia loops. *Eur J Neurosci* 39:1951–1959.
- 854 Brown P (2006) Bad oscillations in Parkinson’s disease. *J Neural Transm Suppl*:27–30.
- 855 Buschman TJ, Denovellis EL, Diogo C, Bullock D, Miller EK (2012) Synchronous oscillatory  
856 neural ensembles for rules in the prefrontal cortex. *Neuron* 76:838–846.
- 857 Buschman TJ, Miller EK (2007) Top-Down Versus Bottom-Up Control of Attention in the  
858 Prefrontal and Posterior Parietal Cortices. *Science* 315:1860–1862.
- 859 Cannon J, McCarthy MM, Lee S, Lee J, Börgers C, Whittington MA, Kopell N (2014)  
860 Neurosystems: brain rhythms and cognitive processing. *Eur J Neurosci* 39:705–719.
- 861 Chakarov V, Naranjo JR, Schulte-Mönting J, Omlor W, Huethe F, Kristeva R (2009) Beta-range  
862 EEG-EMG coherence with isometric compensation for increasing modulated low-level  
863 forces. *J Neurophysiol* 102:1115–1120.
- 864 Chandrasekaran C, Peixoto D, Newsome WT, Shenoy KV (2017) Laminar differences in  
865 decision-related neural activity in dorsal premotor cortex. *Nat Commun* 8:614.
- 866 Chen D, Fetz EE (2005) Characteristic membrane potential trajectories in primate sensorimotor  
867 cortex neurons recorded in vivo. *J Neurophysiol* 94:2713–2725.

- 868 Coallier E, Michelet T, Kalaska JF (2015) Dorsal premotor cortex: neural correlates of reach  
869 target decisions based on a color-location matching rule and conflicting sensory evidence. *J*  
870 *Neurophysiol* 113:3543–3573.
- 871 Cooper GF, Robson JG, Waldron I (1969) The action potentials recorded from undamaged  
872 nerve fibres with micro-electrodes. *J Physiol* 200:9P – 11P.
- 873 DePasquale B, Graybiel AM (2015) Bursts of beta oscillation differentiate postperformance  
874 activity in the striatum and motor cortex of monkeys performing movement tasks.  
875 *Proceedings of the Available at:* <http://www.pnas.org/content/112/44/13687.short>.
- 876 Engel AK, Fries P (2010) Beta-band oscillations - signalling the status quo? *Curr Opin Neurobiol*  
877 20:156–165.
- 878 Flint RD, Wright ZA, Scheid MR, Slutzky MW (2013) Long term, stable brain machine interface  
879 performance using local field potentials and multiunit spikes. *J Neural Eng* 10:056005.
- 880 Gilbertson T, Lalo E, Doyle L, Di Lazzaro V, Cioni B, Brown P (2005) Existing Motor State Is  
881 Favored at the Expense of New Movement during 13-35 Hz Oscillatory Synchrony in the  
882 Human Corticospinal System. *J Neurosci* 25:7771–7779.
- 883 Gilja V, Pandarinath C, Blabe CH, Nuyujukian P, Simeral JD, Sarma AA, Sorice BL, Perge JA,  
884 Jarosiewicz B, Hochberg LR, Shenoy KV, Henderson JM (2015) Clinical translation of a  
885 high-performance neural prosthesis. *Nat Med* 21:1142–1145.
- 886 Groppe D (2016) `fdr_bh`. MATLAB Central File Exchange. Available at:  
887 [https://www.mathworks.com/matlabcentral/fileexchange/27418-fdr-](https://www.mathworks.com/matlabcentral/fileexchange/27418-fdr-bh?focused=5807896&tab=function)  
888 [bh?focused=5807896&tab=function](https://www.mathworks.com/matlabcentral/fileexchange/27418-fdr-bh?focused=5807896&tab=function).
- 889 Haegens S, Vergara J, Rossi-Pool R, Lemus L, Romo R (2017) Beta oscillations reflect  
890 supramodal information during perceptual judgment. *Proc Natl Acad Sci U S A* 114:13810–  
891 13815.
- 892 Haenschel C, Baldeweg T, Croft RJ, Whittington M, Gruzelier J (2000) Gamma and beta  
893 frequency oscillations in response to novel auditory stimuli: A comparison of human  
894 electroencephalogram (EEG) data with in vitro models. *Proc Natl Acad Sci U S A* 97:7645–  
895 7650.
- 896 Kaliukhovich DA, Vogels R (2012) Stimulus repetition affects both strength and synchrony of  
897 macaque inferior temporal cortical activity. *J Neurophysiol* 107:3509–3527.
- 898 Khanna P, Carmena JM (2015) Neural oscillations: beta band activity across motor networks.  
899 *Curr Opin Neurobiol* 32:60–67.
- 900 Khanna P, Carmena JM (2017) Beta band oscillations in motor cortex reflect neural population  
901 signals that delay movement onset. *Elife* 6 Available at:  
902 <http://dx.doi.org/10.7554/eLife.24573>.
- 903 Kilavik BE, Ponce-Alvarez A, Trachel R, Confais J, Takerkart S, Riehle A (2012) Context-related  
904 frequency modulations of macaque motor cortical LFP beta oscillations. *Cereb Cortex*  
905 22:2148–2159.
- 906 Kilavik BE, Zaepffel M, Brovelli A, MacKay WA, Riehle A (2013) The ups and downs of beta

- 907 oscillations in sensorimotor cortex. *Exp Neurol* 245:15–26.
- 908 Kilner, M.; Baker J, Salenius SN;., Jousmaki S;., Hari V;., Lemon R;., N. R (1999) Task-  
909 dependent modulation of 15-30 Hz coherence between rectified EMGs from human hand  
910 and forearm muscles. *J Physiol* 516:559–570.
- 911 Klostermann F, Nikulin VV, Kühn AA, Marzinzik F, Wahl M, Pogosyan A, Kupsch A, Schneider  
912 G-H, Brown P, Curio G (2007) Task-related differential dynamics of EEG alpha- and beta-  
913 band synchronization in cortico-basal motor structures. *Eur J Neurosci* 25:1604–1615.
- 914 Kondabolu K, Roberts EA, Bucklin M, McCarthy MM, Kopell N, Han X (2016) Striatal cholinergic  
915 interneurons generate beta and gamma oscillations in the corticostriatal circuit and produce  
916 motor deficits. *Proc Natl Acad Sci U S A* 113:E3159–E3168.
- 917 Kopell N, Whittington MA, Kramer MA (2011) Neuronal assembly dynamics in the beta1  
918 frequency range permits short-term memory. *Proc Natl Acad Sci U S A* 108:3779–3784.
- 919 Kramer MA, Roopun AK, Carracedo LM, Traub RD, Whittington MA, Kopell NJ (2008) Rhythm  
920 Generation through Period Concatenation in Rat Somatosensory Cortex. *PLoS Comput  
921 Biol* 4:e1000169.
- 922 Kristeva, Patino R, Omlor L, Wolfgang (2007) Beta-range cortical motor spectral power and  
923 corticomuscular coherence as a mechanism for effective corticospinal interaction during  
924 steady-state motor output. *Neuroimage* 36:785–792.
- 925 Lee D (2003) Coherent oscillations in neuronal activity of the supplementary motor area during  
926 a visuomotor task. *J Neurosci* 23:6798–6809.
- 927 Lee JH, Whittington MA, Kopell NJ (2013) Top-Down Beta Rhythms Support Selective Attention  
928 via Interlaminar Interaction: A Model. *PLoS Comput Biol* 9:e1003164.
- 929 Mitra P, Bokil H, Maniar H, Loader C, Mehta S, Hill D, Mitra S, Andrews P, Baptista R, Gopinath  
930 S, Nalatore H, Kaur S (2016) Chronux. Available at: <http://chronux.org/>.
- 931 Mitra PP, Bokil H (2008) *Observed Brain Dynamics*. Oxford University Press.
- 932 Murthy VN, Fetz EE (1992) Coherent 25- to 35-Hz oscillations in the sensorimotor cortex of  
933 awake behaving monkeys. *Proc Natl Acad Sci U S A* 89:5670–5674.
- 934 Pandarinath C, Nuyujukian P, Blabe CH, Sorice BL, Saab J, Willett FR, Hochberg LR, Shenoy  
935 KV, Henderson JM (2017a) High performance communication by people with paralysis  
936 using an intracortical brain-computer interface. *eLife Sciences* 6:e18554.
- 937 Pandarinath C, O’Shea DJ, Collins J, Jozefowicz R, Stavisky SD, Kao JC, Trautmann EM,  
938 Kaufman MT, Ryu SI, Hochberg LR, Henderson JM, Shenoy KV, Abbott LF, Sussillo D  
939 (2017b) Inferring single-trial neural population dynamics using sequential auto-encoders.  
940 bioRxiv:152884 Available at: <https://www.biorxiv.org/content/early/2017/06/20/152884>  
941 [Accessed April 9, 2018].
- 942 Pesaran B, Nelson MJ, Andersen RA (2008) Free choice activates a decision circuit between  
943 frontal and parietal cortex. *Nature* 453:406–409.
- 944 Pogosyan, Gaynor A, Eusebio LD, Brown A, Peter (2009) Boosting cortical activity at beta-band

- 945 frequencies slows movement in humans. *Curr Biol* 19:1637–1641.
- 946 Proudfoot M, Rohenkohl G, Quinn A, Colclough GL, Wu J, Talbot K, Woolrich MW, Benatar M,  
947 Nobre AC, Turner MR (2017) Altered cortical beta-band oscillations reflect motor system  
948 degeneration in amyotrophic lateral sclerosis. *Hum Brain Mapp* 38:237–254.
- 949 Riddle CN, Baker SN (2006) Digit displacement, not object compliance, underlies task  
950 dependent modulations in human corticomuscular coherence. *Neuroimage* 33:618–627.
- 951 Roitman JD, Shadlen MN (2002) Response of neurons in the lateral intraparietal area during a  
952 combined visual discrimination reaction time task. *J Neurosci* 22:9475–9489.
- 953 Roopun AK, Middleton SJ, Cunningham MO, LeBeau FEN, Bibbig A, Whittington MA, Traub RD  
954 (2006) A beta2-frequency (20–30 Hz) oscillation in nonsynaptic networks of somatosensory  
955 cortex. *Proc Natl Acad Sci U S A* 103:15646–15650.
- 956 Rossiter HE, Boudrias MH, Ward NS (2014a) Do movement-related beta oscillations change  
957 after stroke? *J Neurophysiol* 112:2053–2058.
- 958 Rossiter HE, Davis EM, Clark EV, Boudrias MH, Ward NS (2014b) Beta oscillations reflect  
959 changes in motor cortex inhibition in healthy ageing. *Neuroimage* 91:360–365.
- 960 Rubino, Robbins D, Hatsopoulos KA, Nicholas G (2006) Propagating waves mediate  
961 information transfer in the motor cortex. *Nat Neurosci* 9:1549–1557.
- 962 Saleh M, Reimer J, Penn R, Ojakangas CL, Hatsopoulos NG (2010) Fast and Slow Oscillations  
963 in Human Primary Motor Cortex Predict Oncoming Behaviorally Relevant Cues. *Neuron*  
964 65:461–471.
- 965 Sanes JN, Donoghue JP (1993) Oscillations in local field potentials of the primate motor cortex  
966 during voluntary movement. *Proceedings of the National Academy of the Sciences of the*  
967 *United States of America*.
- 968 Sherman MA, Lee S, Law R, Haegens S, Thorn CA, Hamalainen MS, Moore CI, Jones SR  
969 (2016) Neural mechanisms of transient neocortical beta rhythms: Converging evidence  
970 from humans, computational modeling, monkeys, and mice. *Proc Natl Acad Sci U S A*  
971 113:E4885–E4894.
- 972 So K, Dangi S, Orsborn AL, Gastpar MC, Carmena JM (2014) Subject-specific modulation of  
973 local field potential spectral power during brain-machine interface control in primates. *J*  
974 *Neural Eng* 11:026002.
- 975 Spitzer B, Haegens S (2017) Beyond the Status Quo: A Role for Beta Oscillations in  
976 Endogenous Content (Re)Activation. *eNeuro* 4 Available at:  
977 <http://dx.doi.org/10.1523/ENEURO.0170-17.2017>.
- 978 Stavisky SD, Kao JC, Nuyujukian P, Ryu SI, Shenoy KV (2015) A high performing brain-  
979 machine interface driven by low-frequency local field potentials alone and together with  
980 spikes. *J Neural Eng* 12:036009.
- 981 Stetson C, Andersen RA (2014) The parietal reach region selectively anti-synchronizes with  
982 dorsal premotor cortex during planning. *J Neurosci* 34:11948–11958.

- 983 Tzagarakis, Ince C, Leuthold NF;., Pellizzer AC;., Giuseppe (2010) Beta-band activity during  
984 motor planning reflects response uncertainty. *J Neurosci* 30:11270–11277.
- 985 Wetmore DZ, Baker SN (2004) Post-spike distance-to-threshold trajectories of neurones in  
986 monkey motor cortex. *J Physiol* 555:831–850.
- 987 Wichmann FA, Hill NJ (2001) The psychometric function: I. Fitting, sampling, and goodness of  
988 fit. *Percept Psychophys* 63:1293–1313.
- 989 Yamawaki N, Stanford IM, Hall SD, Woodhall GL (2008) Pharmacologically induced and  
990 stimulus evoked rhythmic neuronal oscillatory activity in the primary motor cortex in vitro.  
991 *Neuroscience* 151:386–395.
- 992 Zaepffel, Trachel M, Kilavik R, Brochier BE, Thomas (2013) Modulations of EEG beta power  
993 during planning and execution of grasping movements. *PLoS One* 8.
- 994 Zhang, Wang Y, Bressler X, Chen SL;., Ding Y, Mingzhou (2008) Prestimulus Cortical Activity is  
995 Correlated with Speed of Visuomotor Processing. *Journal of Cognitive Neuroscience*  
996 20:1915–1925.
- 997
